# Supplementary material for: A meta-analysis of sex differences in human brain structure
Source: PubMed Central journal article supplement (PMC3969295; doi:10.1016/j.neubiorev.2013.12.004), 2014-02

Study index (% variance explained)

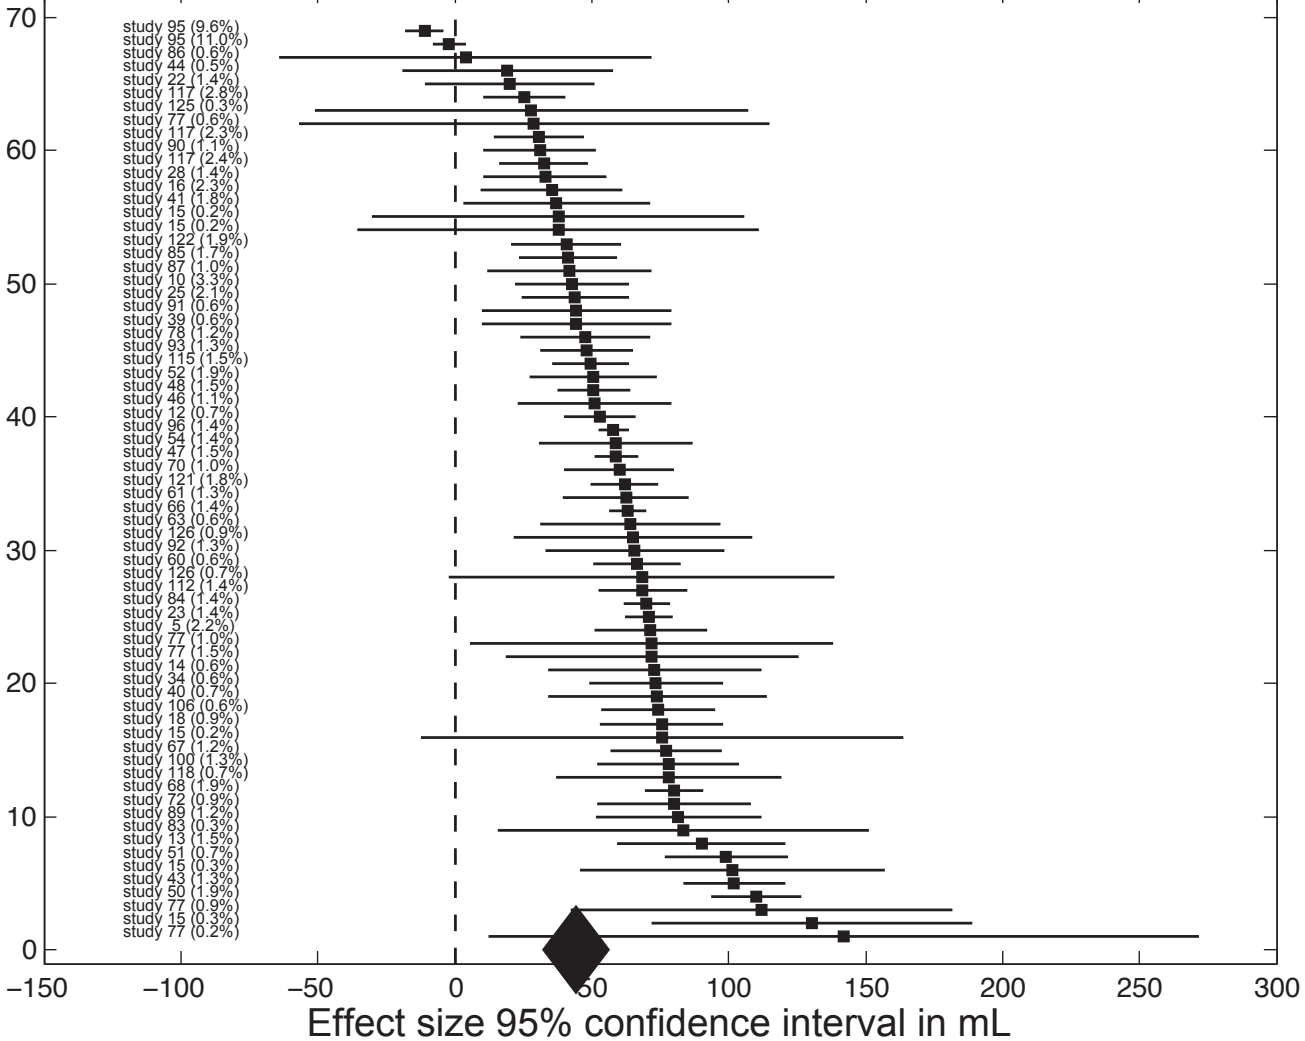

Supplement: mmc8.pdf [file mmc8.pdf]
