# Supplementary material for: A meta-analysis of sex differences in human brain structure
Source: PubMed Central journal article supplement (PMC3969295; doi:10.1016/j.neubiorev.2013.12.004), 2014-02

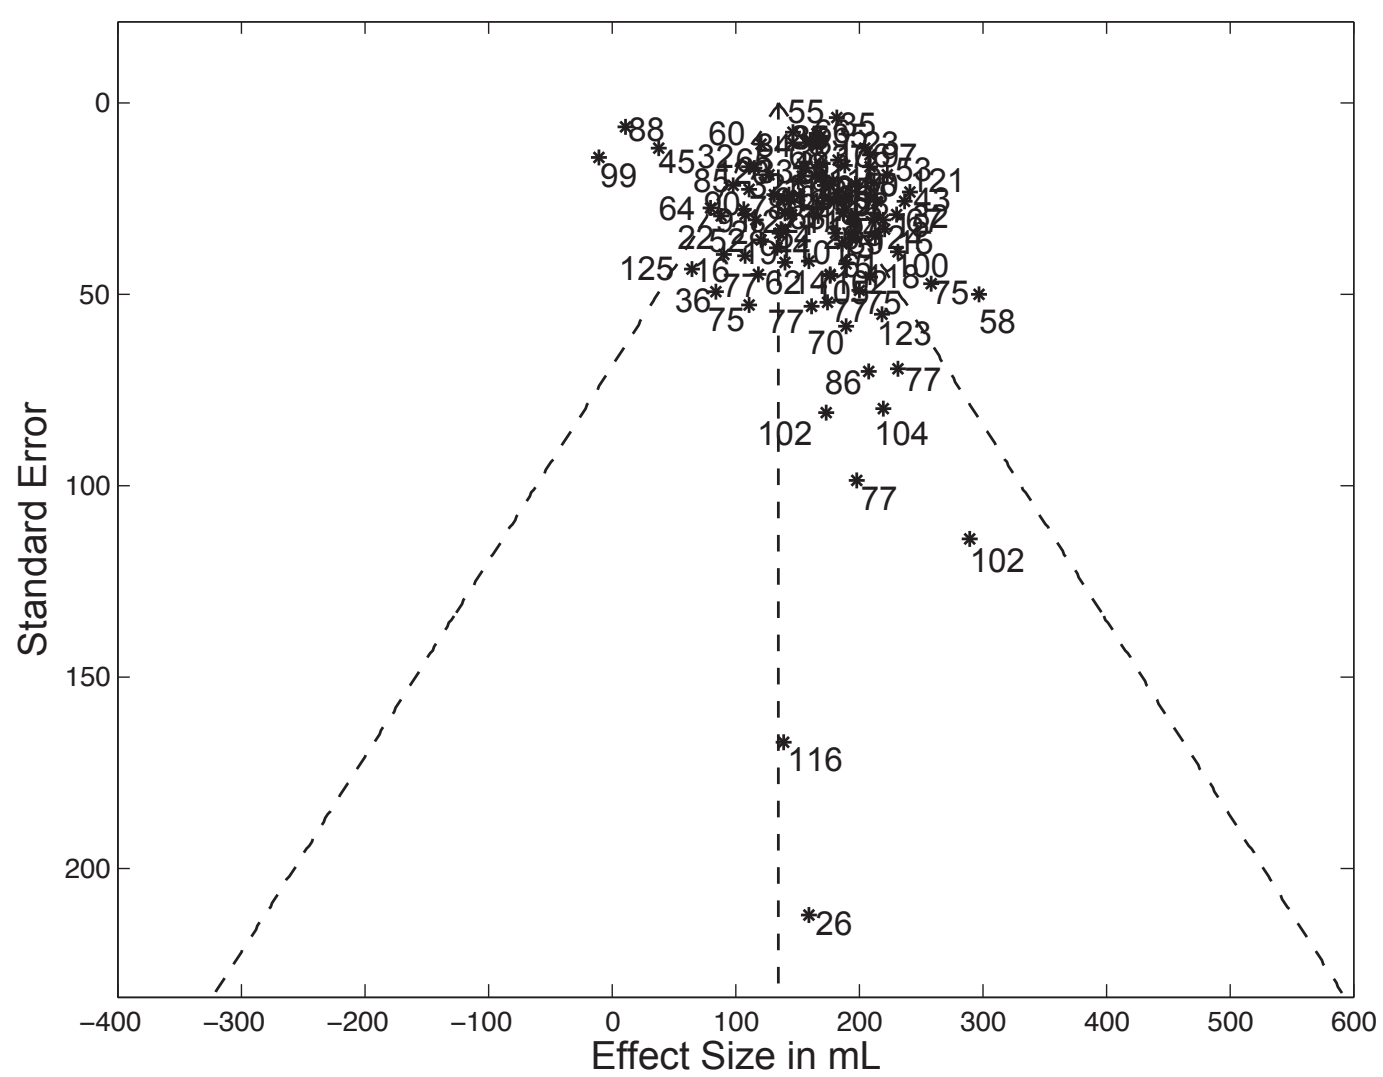

Supplement: mmc11.pdf [file mmc11.pdf]
