# Supplementary material for: A meta-analysis of sex differences in human brain structure
Source: PubMed Central journal article supplement (PMC3969295; doi:10.1016/j.neubiorev.2013.12.004), 2014-02

**a**

Number of articles providing WM by age category

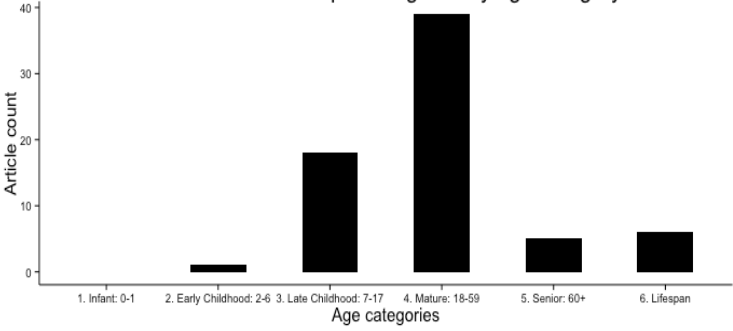**b**

Total number of participants in each age category

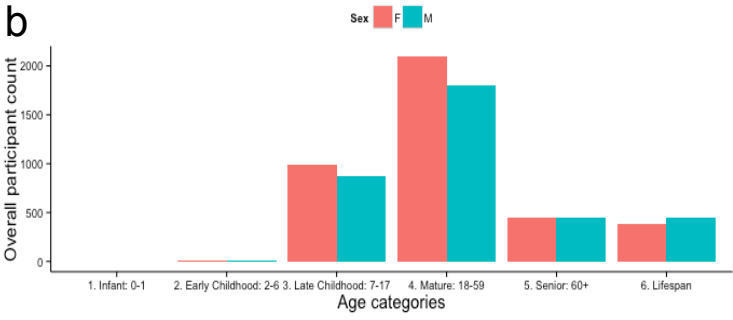**c**

Weighted WM volumes by sex for each age category

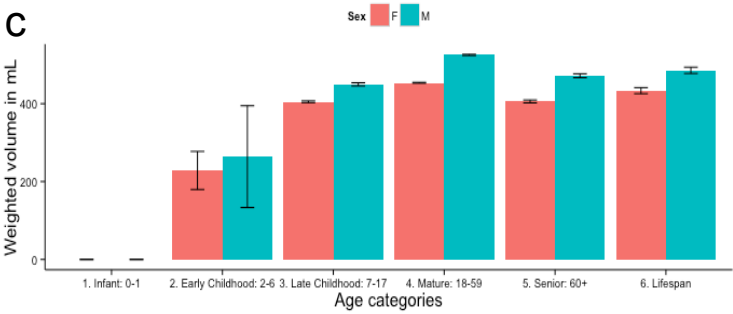

Supplement: mmc20.pdf [file mmc20.pdf]
